# Supplementary material for: Biliary atresia-specific deciduous pulp stem cells feature biliary deficiency
Source: PubMed Central journal article supplement (PMC8607730; doi:10.1186/s13287-021-02652-8), 2021-11-22
Supplement: 13287_2021_2652_MOESM1_ESM.pdf [file 13287_2021_2652_MOESM1_ESM.pdf]

## **Supplementary Information**

### **Biliary atresia-specific deciduous pulp stem cells feature biliary deficiency**

Soichiro Sonoda, Koichiro Yoshimaru, Haruyoshi Yamaza, Ratih Yuniartha, Toshiharu Matsuura, Erika Yamauchi-Tomoda, Sara Murata, Kento Nishida, Yoshinao Oda, Shouichi Ohga, Tatsuro Tajiri, Tomoaki Taguchi, Takayoshi Yamaza

## Supplementary Methods

### *Immunogenicity assay of BA-SHED*

The expression of immunogenic markers including cofactors (CD40, CD80, and CD86), T cells (CD3, CD4, CD8a, and CD28) were analyzed in P3 Cont-SHED and BA-SHED by flow cytometric analysis. Cell suspension was incubated with R-phycoerythrin (R-PE)-conjugated primary antibodies (1  $\mu\text{g}$  per 100  $\mu\text{L}$  Hanks' balanced salt solution (Nacalai Tesque, Kyoto, Japan); **Additional file 1: Supplementary Table 2**) at 4°C for 45 min and measured on a FACSVerser flow cytometer (BD Biosciences, Franklin Lake, NJ, USA). As controls, isotype-matched antibodies conjugated with R-PE were used instead of primary antibodies. The percentage of positive cells was determined using FACSsuite software (BD Biosciences) compared to control cells stained with corresponding isotype-matched antibodies in which a false-positive rate of less than 1% was accepted.

For mixed lymphocyte reaction assay, Cont-SHED and BA-SHED ( $1.0 \times 10^5$  per well) and human PBMCs ( $1.0 \times 10^5$  per well) were preconditioned with gamma irradiation (30 Gy) under an MBR-1520R-3 X-ray irradiator (Hitachi, Tokyo, Japan).

Allogenic PBMCs ( $1.0 \times 10^6$  per well) were co-cultured with or without the preconditioned SHED or PBMNCs in a lymphocyte complete medium with or without phytohemagglutinin (PHA; 5  $\mu\text{g}/\text{mL}$ , Merck, Darmstadt, Germany). The lymphocyte complete medium was consisted of 10% heat-inactivated FBS (Equitech-Bio, Kerrville, TX, USA), 2 mM L-glutamine (Nacalai Tesque), 1 mM sodium pyruvate (Nacalai Tesque), and premixed P/S (Nacalai Tesque) in RPMI-1640 medium (Thermo Fisher Scientific, Waltham, MA, USA) for 5 days. The cell viability of the PBMCs was assayed using a Cell Counting Kit-8 (Dojindo, Kumamoto, Japan) according to the manufacturer's instructions and measured using a Multiscan GO microplate spectrophotometer (Thermo Fisher Scientific).

#### *Global DNA methylation assay*

Genome DNA were collected from cultured cells and used for quantifying 5-methylcytosine (5-mC) levels using a commercially available kit (**Additional file 1: Supplementary Table 5**), according to the manufacturer's instructions. The results were measured using a Multiscan GO microplate reader (Thermo Fisher Scientific).

## Supplementary Materials

**Supplementary Table 1.** The list of specific antibodies for immunohistochemistry and immunofluorescence.

| Antibody names, antigens     | Antibody types, hosts, clone names    | Supplier names            |
|------------------------------|---------------------------------------|---------------------------|
| anti-ACTA2 antibody, mouse   | purified IgG2a, mouse, ASM-1/1A4      | Merck                     |
| anti-ALB antibody, human     | purified IgG, rabbit                  | Cell Signaling Technology |
| Anti-CDH1 antibody, human    | purified IgG, rabbit                  | Cell Signaling Technology |
| anti-HepPar1 antibody, human | purified IgG1, mouse, OCH1E5          | Abcam                     |
| anti-HLA-ABC antibody, human | purified IgG2a, mouse, W6/32          | Abcam                     |
| anti-hMt antibody, human     | purified, mouse IgG1, 113-1           | Abcam                     |
| anti-KRT18 antibody, human   | purified IgG1, mouse, CK-18           | Abcam                     |
| anti-KRT19 antibody, human   | purified IgG1, mouse, RCK108          | Abcam                     |
| control mouse IgG1 kappa     | purified IgG1 kappa, mouse, MOPC-21   | Abcam                     |
| control mouse IgG2a kappa    | purified IgG2a kappa, mouse, MOPC-173 | Abcam                     |
| control rabbit IgG           | purified IgG, rabbit                  | Abcam                     |

ACTA2, actin, alpha 2, smooth muscle; ALB, albumin; CHD1, cadherin 1; HepPar1, human hepatocyte paraffin 1; HLA-ABC, human leukocyte antigens A, B, and C; hMt, human mitochondria; KRT18, cytokeratin 18; KRT19, cytokeratin 19.

**Supplementary Table 2.** The list of specific antibodies for flow cytometry

| <b>Antibody names, antigens</b> | <b>Antibody types, hosts, clone names</b>    | <b>Supplier names</b> |
|---------------------------------|----------------------------------------------|-----------------------|
| anti-CD3 antibody, human        | R-PE-conjugated IgG2b kappa, mouse, HIT3a    | BioLegend             |
| anti-CD4 antibody, human        | R-PE-conjugated IgG2b kappa, mouse, OKT4     | BioLegend             |
| anti-CD8a antibody, human       | R-PE -conjugated IgG1 kappa, mouse, HIT8a    | BioLegend             |
| anti-CD11b antibody, human      | R-PE -conjugated IgG1 kappa, mouse, HI111    | BioLegend             |
| anti-CD14 antibody, human       | R-PE -conjugated IgG1 kappa, mouse, 63D3     | BioLegend             |
| anti-CD19 antibody, human       | R-PE -conjugated IgG1 kappa, mouse, 47G      | BioLegend             |
| anti-CD28 antibody, human       | R-PE -conjugated IgG1 kappa, mouse, CD28.2   | BioLegend             |
| anti-CD34 antibody, human       | R-PE-conjugated IgG2a kappa, mouse, 561      | BioLegend             |
| anti-CD40 antibody, human       | R-PE-conjugated IgG1 kappa, mouse, 5C3       | BioLegend             |
| anti-CD45 antibody, human       | R-PE-conjugated IgG1 kappa, mouse, 2D1       | BioLegend             |
| anti-CD80 antibody, human       | R-PE-conjugated IgG1 kappa, mouse, 2D10      | BioLegend             |
| anti-CD86 antibody, human       | R-PE-conjugated IgG1 kappa, mouse, BU63      | BioLegend             |
| anti-CD90 antibody, human       | R-PE-conjugated IgG1 kappa, mouse, 5E10      | BioLegend             |
| anti-CD73 antibody, human       | R-PE-conjugated IgG1 kappa, mouse, AD2       | BioLegend             |
| anti-CD105 antibody, human      | R-PE-conjugated IgG1 kappa, mouse, 43A3      | BioLegend             |
| anti-CD146 antibody, human      | R-PE-conjugated IgG1 kappa, mouse, P1H112    | BioLegend             |
| anti-HLA-DR antibody, human     | R-PE-conjugated IgG2a kappa, mouse, L243     | BioLegend             |
| control mouse IgG1 kappa        | R-PE-conjugated IgG1 kappa, mouse, MOPC-21   | BioLegend             |
| control mouse IgG2a kappa       | R-PE-conjugated IgG2a kappa, mouse, MOPC-173 | BioLegend             |
| control mouse IgG2b kappa       | R-PE-conjugated IgG2a kappa, mouse, MPC-11   | BioLegend             |

HLA-DR: human leukocyte antigen DR; R-PE: R-phycoerythrin

**Supplementary Table 3.** The list of TaqMan probes for human genes.

| Gene names     | Gene assay ID Numbers | Gene names    | Gene assay ID Numbers |
|----------------|-----------------------|---------------|-----------------------|
| <i>ALB</i>     | Hs00910225_m1         | <i>HGF</i>    | Hs00300159_m1         |
| <i>ARG2</i>    | Hs00982833_m1         | <i>KRT18</i>  | Hs02827483_g1         |
| <i>ASL</i>     | Hs00902699_m1         | <i>LPL</i>    | Hs00173425_m1         |
| <i>ASS1</i>    | Hs01597989_g1         | <i>NAGS</i>   | Hs00400246_m1         |
| <i>BGLAP</i>   | Hs01587814_g1         | <i>OTC</i>    | Hs00166892_m1         |
| <i>COL10A1</i> | S00166657_m1          | <i>PPARG</i>  | Hs0115513_m1          |
| <i>CPS1</i>    | Hs00157048_m1         | <i>RUNX2</i>  | Hs00231692_m1         |
| <i>CYP3A4</i>  | Hs00604506_m1         | <i>SOX9</i>   | Hs01001343_g1         |
| <i>CYP3A7</i>  | Hs00426361_m1         | <i>SREBF1</i> | Hs01088691_m1         |
| <i>FAH</i>     | Hs00164611_m1         | <i>TAT</i>    | Hs00356930_m1         |
| <i>FASN</i>    | Hs01005622_m1         | 18S rRNA      | Hs99999901_s1         |
| <i>GSK3B</i>   | Hs01047719_m1         |               |                       |

*ALB*, albumin; *ARG2*, arginase 2; *ASL*, argininosuccinate lyase; *ASS1*, argininosuccinate synthase 1; *BGLAP*, bone gamma-carboxyglutamate protein; *COL10A1*, collagen, type X, alpha 1; *CPS1*, carbamoyl-phosphate synthase 1; *CYP3A4*: cytochrome P450 3 subfamily A member 4; *CYP3A7*: cytochrome P450 3 subfamily A member 7; *FAH*, fumarylacetoacetate hydrolase gene; *FASN*, fatty acid synthase; *GSK3B*, glycogen synthase kinase 3 beta gene; *HGF*, hepatocyte growth factor; *KRT18*, keratin 18; *LPL*, lipoprotein lipase; *NAGS*, N-acetylglutamate synthase; *OTC*, ornithine transcarbamylase; *PPARG*, peroxisome proliferator-activated receptor gamma; *RUNX2*, runt related transcription factor 2; *SOX9*, SRY-box9; *SREBF1*, sterol regulatory element binding transcriptional factor 1; *TAT*, tyrosine aminotransferase.

**Supplementary Table 4.** The list of TaqMan probes for mouse genes.

| <b>Gene names</b> | <b>Gene assay ID Numbers</b> |
|-------------------|------------------------------|
| <i>Acta2</i>      | Mm00725412_s1                |
| <i>Colla1</i>     | Mm00801666_g1                |
| <i>IL6</i>        | Mm00446190_m1                |
| <i>Mmp2</i>       | Mm00439498_m1                |
| <i>Mmp9</i>       | Mm00442991_m1                |
| <i>Tgfb1</i>      | Mm01178820_m1                |
| <i>Timp1</i>      | Mm01341361_m1                |
| <i>Timp2</i>      | Mm00441825_m1                |
| <i>Tnfa</i>       | Mm00443258_m1                |
| 18S rRNA          | Mm03928990_g1                |

*Acta2*, actin, alpha 2, smooth muscle; *Colla1*, collagen, type I, alpha 1; *Mmp2*, matrix metalloproteinase 2; *Mmp9*, matrix metalloproteinase 9; *Tgfb*, transforming growth factor beta; *Timp1*, tissue inhibitor of metalloproteinase 1; *Timp2*, tissue inhibitor of metalloproteinase 2; *Tnfa*, tumor necrosis factor alpha.

**Supplementary Table 5.** The list of commercially available kits for colormetric and enzyme labelled immunosorbent assays.

| <b>Test names</b>           | <b>Kit names</b>                                               | <b>Supplier names</b>        |
|-----------------------------|----------------------------------------------------------------|------------------------------|
| ALB                         | AssayMAX Human Albumin ELISA Kit                               | AssayPro                     |
| ALT, AST                    | Transaminase CII-Test Kit                                      | FUJIFILM Wako Pure Chemicals |
| Bilirubin, direct and total | QuantiChrom Bilirubin Assay Kit                                | BioAssay Systems             |
| 5-mC DNA                    | MethylFlash Global DNA Methylation (5-mC/5-hmC) ELISA Easy Kit | Epigentek                    |
| Glucose                     | Glucose CII-test                                               | FUJIFILM Wako Pure Chemicals |
| Triglyceride                | Triglyceride E-test 1                                          | FUJIFILM Wako Pure Chemicals |
| Urea                        | Urea Assay Kit                                                 | Abcam                        |

ALB, albumin; ALT, alanine aminotransferase; AST, aspartate aminotransferase; CYP3A4: cytochrome P450 3 subfamily A member 4; 5-mC, 5- methylcytosine



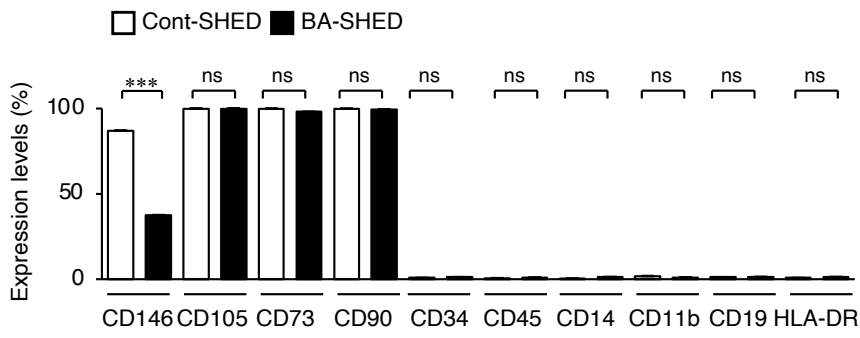

**Supplementary Figure 1. Expression of mesenchymal stem cell (MSC) markers in stem cells from human exfoliated deciduous teeth from biliary atresia patients (BA-SHED) and healthy donors (Cont-SHED).** The graphs show the expression levels (%) of MSC markers in Cont-SHED and BA-SHED by flow cytometric (FCM) analysis.  $n = 3$  for all groups. HLA-DR, human leukocyte antigen DR.  $***P < 0.005$ . ns, no significance. The graph bars represent the means  $\pm$  standard error of mean (SEM).

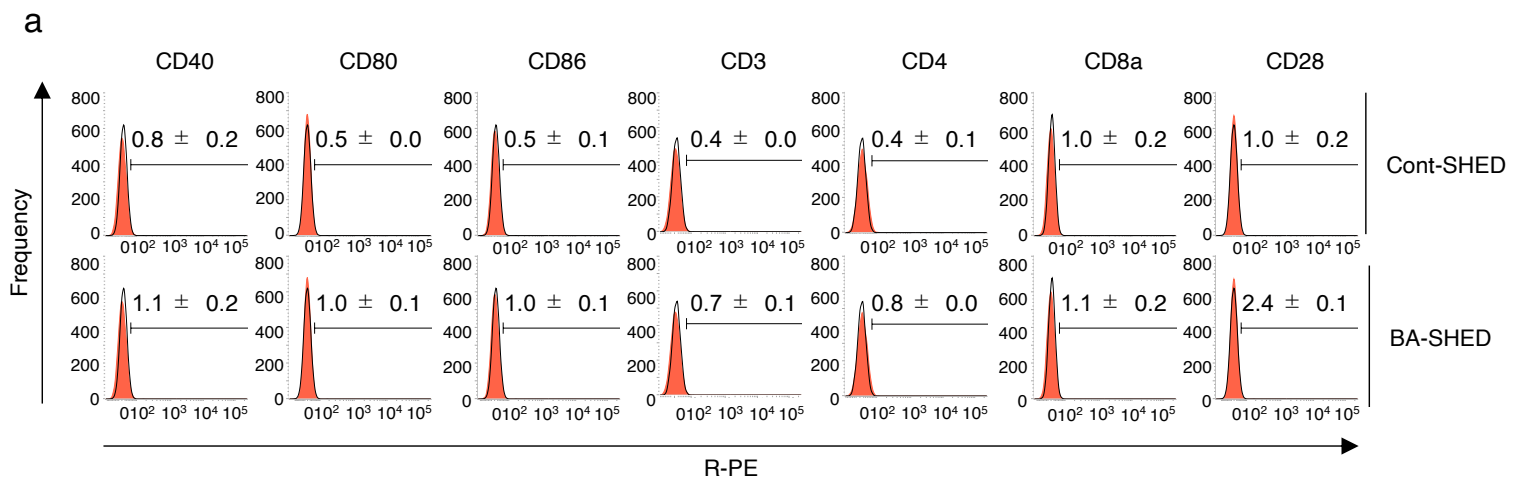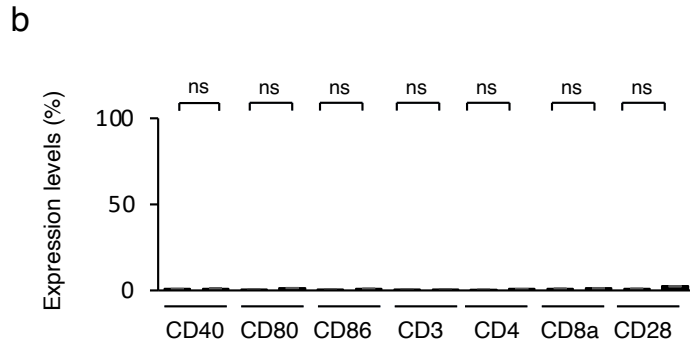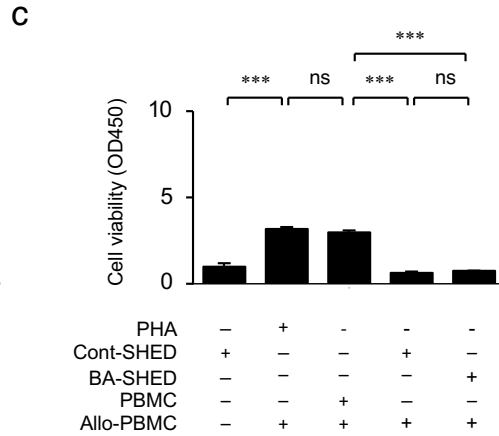

**Supplementary Figure 2. Expression of antigenic surface antigens in BA-SHED and Cont-SHED.**

(a) Representative histograms of antigenic surface antigens were analyzed by FCM analysis. The numbers indicate the means  $\pm$  SEM of positive rate of target markers. Areas filled with red; target antibody-stained histograms; solid lines; isotype-matched control-stained histograms. (b) The graphs show the expression levels (%) of MSC markers in Cont-SHED and BA-SHED by FCM analysis.  $n = 3$  for all groups. ns, no significance. The graph bars represent the means  $\pm$  SEM. (c) Immunogenicity of Cont-SHED and BA-SHED was analyzed by mixed lymphocyte reaction assay. SHED and PBMCs were gamma-ray irradiated and cocultured with allogenic PBMCs (Allo-PBMCs) under the stimulation with or without phytohemagglutinin (PHA). Graph showing the cell viability of floating PBMCs 3 days after coculture.  $n = 3$  per group. Graph bars show the means  $\pm$  SEM. \*\*\*  $P < 0.005$ . NS: no significance.

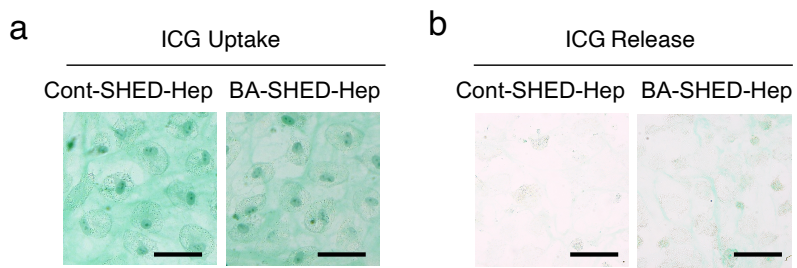

**Supplementary Figure 3. Endocytotic and exocytotic capacity of hepatocyte like cells converted from BA-SHED (BA-SHED-Heps) and Cont-SHED (Cont-SHED-Heps).** Representative images show indocyanine green (ICG) uptake (**a**) and release (**b**). Scale bars, 30  $\mu$ m.

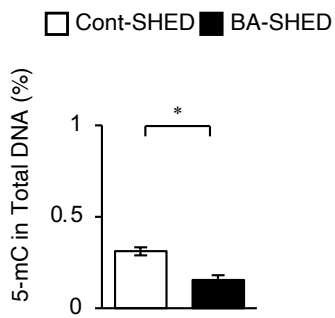

**Supplementary Figure 4. Global methylation analysis of BA-SHED and Cont-SHED.** The graphs show the 5-methylcytosine (5-mC) levels (%) in Cont-SHED and BA-SHED by enzyme-linked immunosorbent assay.  $n = 3$  for all groups.  $*P < 0.05$ . The graph bars represent the means  $\pm$  SEM.
